# Supplementary material for: Pesticides in the population of European hedgehogs (Erinaceus europaeus) in Denmark
Source: PubMed Central journal article supplement (PMC11341479; doi:10.3389/fvets.2024.1436965), 2024-08-09
Supplement: Data_Sheet_1.pdf [file Data_Sheet_1.pdf]

## *Supplementary Material*

### **Pesticides in the population of European hedgehogs (*Erinaceus europaeus*) in Denmark**

**Sophie Lund Rasmussen<sup>\*</sup>, Peter Roslev, Jeppe Lund Nielsen, Cino Pertoldi, Katrin Vorkamp**

**Correspondence:** Sophie Lund Rasmussen: [sophielundrasmussen@gmail.com](mailto:sophielundrasmussen@gmail.com)

#### **1 Supplementary Information**

##### **1.1 Selection of rodenticides**

We chose to analyse seven substances in the category of rodenticides: bromadiolone, coumatetralyl, brodifacoum, difenacoum, difethialone,  $\alpha$ -chloralose and  $\beta$ -chloralose. These were selected as they were authorised for use in Denmark and could be used by everyone.

According to the Pesticide Database (1) carbon dioxide, floucomafen, aluminium phosphide as well as chlorophacinone and cholecalciferol were also authorised rodenticides in Denmark in 2016. The latter two substances are for professional use only. As cholecalciferol was not included in the list of pesticides sold in the Pesticide Statistics for 2016, and as chlorophacinone was first authorised for use in 2015, but was not reported in the statistics for 2016, we chose to exclude these from the analysis (2). The substance aluminium phosphide, which according to the Pesticide Statistics for 2016 was approved for use in 2016, was omitted from the analysis as it is a toxic gas and therefore not safe for staff to work with in the laboratory. In addition, it could not be combined with the organic compounds in the same method. We also chose to omit the rodenticide floucomafen, as according to the Pesticide Statistics for 2016, this substance was used very rarely in the years around 2016, as it was only authorised for use by professionals. It was subsequently banned for use in Denmark ultimo 2019 (1, 2).

Bromadiolone, coumatetralyl, brodifacoum, difenacoum and difethialone are all anticoagulants, which are slow-acting poisons that inhibit the blood's ability to clot. They prevent the liver from producing the substance prothrombin, which is necessary for blood to clot. Poisoned rats and mice therefore die from internal bleeding approximately one week after ingesting a lethal dose of the poison.  $\alpha$ -chloralose (and its isomer  $\beta$ -chloralose) is the only non-anticoagulant rodenticide authorised for use in Denmark. The substance anaesthetises the mouse and significantly reduces metabolism, causing a lethal drop in the mouse's body temperature.

## 1.2 Selection of insecticides

### 1.2.1 Fipronil

Fipronil is a phenylpyrazole-based insecticide and acaricide (miticide) that has been commercialised since 1996 (3). It is sold, among other things, as the product Frontline, which is used as a flea repellent for dogs and cats, but also in, for example, ant bait cans (4).

Fipronil affects the neurotransmitter gamma-aminobutyrate (GABA), which controls the transmission of the electrical impulse between nerve cells. Fipronil blocks the GABA-controlled chloride channels in the central nervous system, leading to disruption of the GABA receptors, which inhibit the nerve signal by preventing the uptake of chloride ions. This disruption of the GABA receptors results in additional neurological stimulation and death in the target group, the insects (5). Fipronil binds less strongly to GABA receptors in mammals, making it less toxic to mammals than insects (6). Toxicity has not been scientifically described for hedgehogs, but a growing number of hedgehog keepers have expressed concern that fipronil may be toxic to hedgehogs, as deaths and neurological symptoms have been observed in hedgehogs treated for fleas with the product Frontline (7, 8). However, in some places it is still actively used in the care of orphaned, sick and injured hedgehogs. Fipronil was found to bioaccumulate in fish, and radioactivity originating from <sup>14</sup>C-fipronil administered to rats could also be measured in different organs e.g. livers, adrenal glands and fat tissue, with up to 25% and 75% being excreted with urine and faeces, respectively (9). Concerns have previously been expressed about the effect of fipronil on the reproduction of small insectivorous mammals that consume invertebrates poisoned with fipronil (10) as previous studies have shown that fipronil caused reduced fertility and litter size in rats (11). Fipronil can degrade to fipronil sulphone and sulphide, among other toxic substances (12, 13).

### 1.2.2 Imidacloprid

Imidacloprid is a neonicotinoid insecticide. Neonicotinoids act on specific receptors (nicotinic acetylcholine receptors) in the nervous system of lice and fleas, paralysing and killing them (14). To reduce toxicity in vertebrates, neonicotinoid components have been selected that are highly specific to the subtypes of nicotinic receptors found in insects. Furthermore, neonicotinoids do not cross the blood-brain barrier, which also reduces toxicity in vertebrates (15). However, the use of imidacloprid is of concern due to its effect on insects such as bees (16, 17) which has led to an EU ban in 2018 on the use of certain neonicotinoids, including imidacloprid, as pesticides in agriculture where the environment is exposed (18, 19).

Imidacloprid was among the ten most used active substances in the Danish municipalities in 2016 (20). According to the Pesticide Statistics, 2255 kg of imidacloprid was sold in Denmark in 2016 (2). Imidacloprid is used in the form of flea control products for pets in private households, as it is an ingredient in popular flea control products such as Advantage Vet, Advocate and Bayvantic. Imidacloprid-based flea control products are also used to treat fleas and other ectoparasites in rehabilitated hedgehogs.

### **1.2.3 Permethrin**

Permethrin is a neurotoxic synthetic pyrethroid used as an insecticide. It affects the sodium channels in the membranes of nerve cells by prolonging the flow of sodium, causing depolarisation and resulting in paralysis of the respiratory organs in insects (21).

According to the Pesticide Statistics, 1778 kg permethrin was sold in Denmark in 2016 (2) for use as pesticides, including use as rodenticides and preservatives (against pests in timber). For private use, no sales of permethrin were registered in the report (22) but other pyrethroids such as pyrethrin and cypermethrin were registered. Alpha-cypermethrin is listed as one of the most commonly used pesticides on public land under municipal auspices in 2016 (20). With the high total consumption of pyrethroids, it must therefore be assumed that hedgehogs can potentially be exposed to pyrethroids in various ways in their movement in nature, and possibly also via flea treatment in care.

Permethrin is toxic to cats as they have a reduced ability to break down the substance effectively because they lack the enzyme glucuronidase, which is necessary in the transformation of permethrin through the process of glucuronidation (23). However, this is not the case for dogs. Therefore, permethrin is included in a number of flea control products for dogs. Due to its toxicity in cats, permethrin might also be toxic to hedgehogs, but this has not been scientifically confirmed.

### **1.3 Selection of herbicides**

We selected eight herbicides for the analyses: metamitron, MCPA, 2,4-D, diflufenican, prosulfocarb, bentazone, pendimethalin and fluroxypyr. As several herbicides are authorised for use in Denmark, the selection process was based on the statistics for the consumption of the substances in the country, based on the Danish Environmental Protection Agency's reports on the consumption of herbicides among private individuals, farmers and municipalities for the year 2016. Based on the consumption described in the reports, we selected the substances among the most commonly used.

The substances MCPA, diflufenican and fluroxypyr were among the ten most commonly used active substances in municipal consumption on public land in 2016 (20). MCPA and 2,4-D were on the list of most used herbicides in private gardens in 2017 (22). All the selected substances were sold in large quantities for agricultural use in 2016, ranging from 17,292 kg (2,4-D) to 357,344 kg (prosulfocarb) (2). The list originally also included glyphosate and pelargonic acid, which were excluded after method development, as they could not be analysed with the same method.

## 2 Supplementary Tables

Table 1. Method detection limits (ng/g wet weight) for the selected substances in approximately 0.5 g hedgehog liver.

| <b>Compound</b>      | <b>Method detection limit*</b> |
|----------------------|--------------------------------|
| Coumatetralyl        | 0.07-0.23                      |
| Bromadiolone         | 0.08-0.28                      |
| Difenacoum           | 0.07-0.25                      |
| Brodifacoum          | 0.07-0.25                      |
| Difethialone         | 0.06-0.22                      |
| $\alpha$ -chloralose | 0.07-0.25                      |
| $\beta$ -chloralose  | 0.05-0.19                      |
| Imidacloprid         | 0.14-0.47                      |
| Diflufenican         | 0.07-0.23                      |
| Prosulfocarb         | 0.07-0.25                      |
| MCPA                 | 0.07-0.25                      |
| 2,4-D                | 0.08-0.26                      |
| Fluroxypyr           | 0.07-0.25                      |
| Metamitron           | 0.08-0.26                      |
| Bentazone            | 0.08-0.26                      |
| Pendimethalin        | 0.07-0.24                      |
| Fipronil             | 0.39-1.33                      |
| Cis-permethrin       | 0.05-0.18                      |
| Trans-permethrin     | 0.26-0.90                      |

\*Limits vary between samples due to differences in sample intake. The highest limit is related to a sample of only 0.2 g.

Table 2. Background information of the 115 hedgehogs included in the chemical analyses.

| ID number | Weight of liver sample (g) | Age | Zip code | Municipality   | Sex     | Cause of death         | Latitude  | Longitude | Habitat type | MRSA Negative or Positive | Region                        | Endoparasites | Date of death  |
|-----------|----------------------------|-----|----------|----------------|---------|------------------------|-----------|-----------|--------------|---------------------------|-------------------------------|---------------|----------------|
| 4         | 0.49                       | 4   | 4800     | Guldborgsund   | Male    | Naturally, in the wild | 54.772696 | 11.870536 | Urban area   | Negative                  | Falster                       | Present       | 12.08.2016     |
| 14        | 0.58                       | 5   | 8370     | Favrskov       | Male    | Roadkill               | 56.364406 | 10.116201 | Rural area   |                           | Jutland south of the Limfjord | Absent        | 13.06.2016     |
| 16        | 0.6                        | 10  | 8471     | Favrskov       | Male    | Naturally, in the wild | 56.189738 | 10.010456 | Rural area   | Positive                  | Jutland south of the Limfjord | Present       | 07.07.2016     |
| 24        | 0.58                       | 5   | 8860     | Favrskov       | Male    | In care                | 56.395979 | 9.788539  | Rural area   | Positive                  | Jutland south of the Limfjord | Present       | 08.07.2016     |
| 48        | 0.6                        | 4   | 4990     | Guldborgsund   | Unknown | Roadkill               | 54.824444 | 11.688611 | Rural area   | Positive                  | Lolland                       | Present       | 24.08.2016     |
| 58        | 0.52                       | 5   | 3230     | Helsingør      | Male    | In care                | 56.049957 | 12.379283 | Rural area   | Negative                  | Zealand                       | Present       | 29.07.2016     |
| 60        | 0.53                       | 9   | 4990     | Guldborgsund   | Male    | Roadkill               | 54.800779 | 11.636188 | Urban area   | Positive                  | Lolland                       | Absent        | 19.06.2016     |
| 61        | 0.5                        | 4   | 3120     | Gribskov       | Male    | Naturally, in the wild | 56.096194 | 12.380117 | Urban area   | Positive                  | Zealand                       | Present       | 03.07.2016     |
| 108       | 0.52                       | 1   | 2300     | København      | Male    | Roadkill               | 55.658458 | 12.624532 | Urban area   | Positive                  | Zealand                       | Present       | 04.07.2016     |
| 111       | 0.49                       | 0   | 2960     | Hørsholm       | Female  | In care                | 55.888799 | 12.534718 | Urban area   | Positive                  | Zealand                       | Present       | 25.09.2016     |
| 160       | 0.56                       | 4   | 4200     | Kalundborg     | Female  | Roadkill               | 55.428208 | 11.392723 | Rural area   | Positive                  | Zealand                       | Absent        | 07.07.2016     |
| 171       | 0.52                       | 5   | 2990     | Fredensborg    | Male    | In care                | 55.933359 | 12.500066 | Urban area   | Positive                  | Zealand                       | Present       | 22.07.2016     |
| 182       | 0.6                        | 0   | 4800     | Guldborgsund   | Unknown | Roadkill               | 54.789865 | 11.943214 | Rural area   | Negative                  | Falster                       | Present       | 01.09.2016     |
| 184       | 0.56                       | 0   | 4913     | Lolland        | Male    | Naturally, in the wild | 54.936927 | 11.275177 | Rural area   | Positive                  | Lolland                       | Present       | 16.10.2016     |
| 193       | 0.6                        | 0   | 4000     | Roskilde       | Female  | In care                | 55.735688 | 12.150509 | Urban area   | Positive                  | Zealand                       | Present       | 24.10.2016     |
| 195       | 0.44                       | 0   | 4736     | Næstved        | Female  | Naturally, in the wild | 55.047306 | 12.052231 | Rural area   | Negative                  | Zealand                       | Absent        | 26.09.2016     |
| 196       | 0.51                       | 0   | 4654     | Faxe           | Female  | Naturally, in the wild | 55.216864 | 12.164782 | Urban area   | Positive                  | Zealand                       | Absent        | 01.10.2016     |
| 197       | 0.64                       | 1   | 4654     | Faxe           | Female  | Naturally, in the wild | 55.220570 | 12.175908 | Urban area   | Positive                  | Zealand                       | Present       | 12.09.2016     |
| 199       | 0.59                       | 0   | 2400     | København      | Female  | Naturally, in the wild | 55.694490 | 12.51741  | Urban area   | Negative                  | Zealand                       | Present       | 16.10.2016     |
| 202       | 0.59                       | 0   | 2610     | København      | Male    | Naturally, in the wild | 55.686061 | 12.458769 | Urban area   | Positive                  | Zealand                       | Absent        | 24.10.2017     |
| 206       | 0.54                       | 0   | 2840     | Lyngby-Taarbæk | Female  | In care                | 55.819089 | 12.463856 | Urban area   | Positive                  | Zealand                       | Present       | 26.09.2016     |
| 207       | 0.54                       | 0   | 2720     | København      | Female  | In care                | 55.697449 | 12.479602 | Urban area   | Positive                  | Zealand                       | Absent        | 14.10.2016     |
| 208       | 0.5                        | 0   | 2000     | København      | Male    | Naturally, in the wild | 55.690495 | 12.530109 | Urban area   | Positive                  | Zealand                       | Absent        |                |
| 209       | 0.68                       | 0   |          | Fredensborg    | Male    | In care                |           |           |              | Positive                  | Zealand                       | Present       | 21.11.2016     |
| 210       | 0.59                       | 3   | 4780     | Vordingborg    | Male    | Naturally, in the wild | 54.987339 | 12.292589 | Urban area   | Positive                  | Mon                           | Present       | 30.07.2016     |
| 211       | 0.49                       | 1   | 4771     | Vordingborg    | Male    | Naturally, in the wild | 55.009326 | 12.142245 | Rural area   | Negative                  | Zealand                       | Present       | 02.07.2016     |
| 212       | 0.59                       | 1   | 4720     | Vordingborg    | Male    | In care                | 55.095260 | 12.04732  | Rural area   | Positive                  | Zealand                       | Present       | 20.06.2016     |
| 214       | 0.6                        | 1   | 4654     | Faxe           | Male    | Naturally, in the wild | 55.203577 | 12.138386 | Urban area   | Negative                  | Zealand                       | Present       |                |
| 215       | 0.69                       | 0   |          | Vordingborg    | Male    | Roadkill               |           |           |              |                           | Zealand                       | Present       |                |
| 220       | 0.54                       | 2   | 3700     | Bornholm       | Male    | Roadkill               | 55.116900 | 14.8169   | Rural area   | Positive                  | Bornholm                      | Present       | 06.12.2016     |
| 222       | 0.52                       | 0   | 4220     | Slagelse       | Male    | Roadkill               | 55.313343 | 11.167178 | Urban area   | Negative                  | Zealand                       | Present       | 27.09.2016     |
| 223       | 0.6                        | 3   | 6000     | Kolding        | Male    | Roadkill               | 55.496836 | 9.37952   | Rural area   | Negative                  | Jutland south of the Limfjord | Present       | 24.07.2016     |
| 225       | 0.54                       | 2   | 6000     | Kolding        | Male    | Roadkill               | 55.503043 | 9.4666    | Urban area   | Positive                  | Jutland south of the Limfjord | Present       | 27.07.2016     |
| 226       | 0.56                       | 1   | 9210     | Aalborg        | Male    | Roadkill               | 57.010304 | 9.944091  | Urban area   | Negative                  | Jutland south of the Limfjord | Present       | Summer of 2016 |
| 227       | 0.5                        | 0   | 9400     | Aalborg        | Male    | Roadkill               | 57.065561 | 9.910025  | Urban area   | Positive                  | Jutland north of the Limfjord | Present       | Summer of 2016 |
| 228       | 0.55                       | 0   | 9000     | Aalborg        | Male    | In care                | 57.038954 | 9.958226  | Urban area   | Negative                  | Jutland south of the Limfjord | Present       | 22.05.2016     |
| 229       | 0.53                       | 4   | 8983     | Randers        | Male    | Roadkill               | 56.571546 | 10.116142 | Rural area   | Positive                  | Jutland south of the Limfjord | Present       | 24.06.2016     |

## Supplementary Material

|     |      |    |         |               |        |                        |           |           |            |          |                               |         |                |
|-----|------|----|---------|---------------|--------|------------------------|-----------|-----------|------------|----------|-------------------------------|---------|----------------|
| 230 | 0.64 | 3  | 7000    | Fredericia    | Male   | In care                | 55.595939 | 9.705603  | Rural area | Positive | Jutland south of the Limfjord | Present | 24.06.2016     |
| 234 | 0.6  | 5  | 9500    | Rebild        | Male   | Roadkill               | 56.633424 | 9.81348   | Urban area | Positive | Jutland south of the Limfjord | Present | Summer of 2016 |
| 235 | 0.47 | 2  | 6760    | Esbjerg       | Male   | Roadkill               | 55.334900 | 8.833487  | Rural area | Positive | Jutland south of the Limfjord | Present | 18.07.2016     |
| 236 | 0.49 | 1  | 6715    | Esbjerg       | Male   | Roadkill               | 55.550278 | 8.471329  | Rural area | Positive | Jutland south of the Limfjord | Present | 26.06.2016     |
| 237 | 0.63 | 3  | 8600    | Silkeborg     | Male   | In care                | 56.181696 | 9.700154  | Rural area | Positive | Jutland south of the Limfjord | Present | 01.07.2016     |
| 239 | 0.69 | 2  | 5290    | Kerteminde    | Female | Roadkill               | 55.384760 | 10.527314 | Urban area | Positive | Funen                         | Absent  | July 2016      |
| 240 | 0.54 | 1  | 5540    | Kerteminde    | Female | Roadkill               | 55.307093 | 10.635027 | Urban area | Positive | Funen                         | Present | 19.08.2016     |
| 242 | 0.52 | 16 | 8600    | Silkeborg     | Male   | In care                | 56.166745 | 9.538739  | Urban area | Negative | Jutland south of the Limfjord | Present | 10.07.2016     |
| 247 | 0.52 | 0  | 8766    | Ikast-Brande  | Female | Naturally, in the wild | 55.961713 | 9.392926  | Urban area | Negative | Jutland south of the Limfjord | Present | Summer of 2016 |
| 257 | 0.52 | 1  | 9000    | Aalborg       | Female | In care                | 57.034865 | 9.919984  | Urban area | Positive | Jutland south of the Limfjord | Present | 22.05.2016     |
| 258 | 0.51 | 3  | 9000    | Aalborg       | Female | In care                | 57.038904 | 9.910511  | Urban area | Positive | Jutland south of the Limfjord | Present | 15.07.2016     |
| 262 | 0.65 | 3  | 8800    | Viborg        | Male   | Roadkill               | 56.397222 | 9.726111  | Rural area | Negative | Jutland south of the Limfjord | Absent  | 09.06.2016     |
| 264 | 0.61 | 1  | 8800    | Viborg        | Male   | Roadkill               | 56.441944 | 9.409722  | Urban area | Negative | Jutland south of the Limfjord | Absent  | 17.06.2016     |
| 267 | 0.5  | 3  | 4000    | Roskilde      | Male   | Roadkill               | 55.612299 | 12.040511 | Rural area | Positive | Zealand                       | Absent  | 05.08.2016     |
| 268 | 0.52 | 2  | 4000    | Roskilde      | Male   | Roadkill               | 55.734745 | 12.160652 | Rural area | Positive | Zealand                       | Present |                |
| 273 | 0.6  | 1  | 8464    | Silkeborg     | Female | Roadkill               | 56.151306 | 9.914664  | Urban area | Negative | Jutland south of the Limfjord | Present | 06.06.2016     |
| 278 | 0.5  | 6  | 8860    | Favrskov      | Male   | Roadkill               | 56.434722 | 9.768888  | Rural area |          | Jutland south of the Limfjord | Present | 13.07.2016     |
| 281 | 0.58 | 6  | 9510    | Rebild        | Male   | Roadkill               | 57.248956 | 10.006582 | Rural area | Positive | Jutland south of the Limfjord | Present | 29.06.2016     |
| 305 | 0.61 | 6  | 6640    | Kolding       | Male   | Roadkill               | 55.536977 | 9.364187  | Rural area |          | Jutland south of the Limfjord | Present | 05.07.2016     |
| 311 | 0.46 | 2  | 4760    | Vordingborg   | Male   | In care                | 55.043116 | 12.003326 | Rural area |          | Zealand                       | Present | 28.06.2016     |
| 312 | 0.58 | 3  | 3450    | Allerød       | Female | Naturally, in the wild | 55.865790 | 12.327858 | Urban area | Negative | Zealand                       | Present | 28.07.2016     |
| 326 | 0.59 | 1  | 6715    | Esbjerg       | Male   | Roadkill               | 55.498746 | 8.453148  | Urban area | Positive | Jutland south of the Limfjord | Present | 08.07.2016     |
| 327 | 0.52 | 1  | 2840    | Lynby-Taarbæk | Male   | Naturally, in the wild | 55.816592 | 12.511846 | Urban area | Negative | Zealand                       | Present | 29.06.2016     |
| 328 | 0.59 | 3  | 4250    | Slagelse      | Male   | Roadkill               | 55.816592 | 12.511846 | Urban area |          | Zealand                       | Present | 31.05.2016     |
| 329 | 0.54 | 3  | 4200    | Slagelse      | Male   | Roadkill               | 55.399248 | 11.32221  | Urban area |          | Zealand                       | Present | 19.08.2016     |
| 330 | 0.55 | 3  | 4700    | Næstved       | Male   | Naturally, in the wild | 55.223560 | 11.585252 | Rural area |          | Zealand                       | Present | 03.08.2016     |
| 331 | 0.48 | 3  | 4800    | Guldborgsund  | Female | Naturally, in the wild | 54.756943 | 11.886857 | Urban area |          | Falster                       | Present | 21.09.2016     |
| 332 | 0.54 | 0  | 4800    | Guldborgsund  | Female | In care                | 54.764748 | 11.881477 | Urban area |          | Falster                       | Present | 23.09.2016     |
| 333 | 0.48 | 2  | 4840    | Guldborgsund  | Male   | Naturally, in the wild | 54.940548 | 11.832911 | Rural area |          | Falster                       | Present | 29.09.2016     |
| 334 | 0.69 | 0  | Falster | Guldborgsund  | Male   | Naturally, in the wild |           |           |            |          | Falster                       | Present | 02.10.2016     |
| 336 | 0.57 | 5  | 4840    | Guldborgsund  | Female | Roadkill               | 54.940548 | 11.832911 | Rural area |          | Falster                       | Present | 29.09.2016     |
| 337 | 0.57 | 0  | 4840    | Guldborgsund  | Female | Naturally, in the wild | 54.902614 | 11.872665 | Rural area |          | Falster                       | Present | 10.10.2016     |
| 343 | 0.59 | 10 | 4242    | Slagelse      | Male   | Roadkill               | 55.300332 | 11.259908 | Rural area |          | Zealand                       | Absent  | 01.08.2016     |
| 345 | 0.7  | 4  | 4200    | Slagelse      | Female | Roadkill               | 55.403864 | 11.254957 | Rural area |          | Zealand                       | Absent  | 28.07.2016     |
| 361 | 0.6  | 2  | 4840    | Guldborgsund  | Female | Roadkill               | 54.939157 | 11.752991 | Rural area |          | Falster                       | Present | 09.09.2016     |
| 362 | 0.53 | 0  | 2640    | Høje-Taastrup | Female | In care                | 55.663633 | 12.200717 | Urban area | Negative | Zealand                       | Absent  | 20.08.2016     |
| 365 | 0.58 | 1  | 3720    | Bornholm      | Female | Roadkill               | 55.084800 | 14.8841   | Rural area | Positive | Bornholm                      | Present | 19.10.2016     |
| 366 | 0.47 | 3  | 3720    | Bornholm      | Male   | Roadkill               | 55.069900 | 14.8163   | Rural area | Negative | Bornholm                      | Present | 27.07.2016     |
| 371 | 0.48 | 0  | 3700    | Bornholm      | Male   | Roadkill               | 55.097100 | 14.7358   | Urban area | Negative | Bornholm                      | Present | 06.10.2016     |

|     |      |    |      |                   |         |                        |           |           |            |          |                               |         |            |
|-----|------|----|------|-------------------|---------|------------------------|-----------|-----------|------------|----------|-------------------------------|---------|------------|
| 373 | 0.57 | 2  | 3700 | Bornholm          | Unknown | Roadkill               | 55.112700 | 14.7354   | Rural area | Negative | Bornholm                      | Absent  | 07.07.2016 |
| 377 | 0.57 | 9  | 7000 | Fredericia        | Male    | Naturally, in the wild | 55.629155 | 9.557239  | Rural area | Positive | Jutland south of the Limfjord | Present | 06.07.2016 |
| 380 | 0.6  | 5  | 4160 | Faxe              | Female  | Roadkill               | 55.314077 | 11.682319 | Rural area |          | Zealand                       | Present | 06.08.2016 |
| 385 | 0.55 | 4  | 4180 | Ringsted          | Male    | Roadkill               | 55.444519 | 11.535777 | Rural area |          | Zealand                       | Absent  | 26.09.2016 |
| 397 | 0.59 | 2  | 8464 | Skanderborg       | Male    | Roadkill               | 56.156790 | 9.91821   | Urban area | Negative | Jutland south of the Limfjord | Absent  |            |
| 403 | 0.56 | 13 | 5250 | Odense            | Male    | In care                | 55.378719 | 10.357522 | Urban area |          | Funen                         | Present | 23.10.2016 |
| 407 | 0.61 | 0  | 4241 | Slagelse          | Male    | Naturally, in the wild | 55.360319 | 11.252962 | Urban area |          | Zealand                       |         | 10.10.2016 |
| 408 | 0.48 | 0  | 4241 | Slagelse          | Male    | Naturally, in the wild | 55.360319 | 11.252962 | Urban area |          | Zealand                       | Absent  | 10.10.2016 |
| 414 | 0.46 | 0  | 7160 | Hedensted         | Male    | Roadkill               | 55.894740 | 9.525908  | Rural area | Negative | Jutland south of the Limfjord | Absent  | 01.09.2016 |
| 428 | 0.59 | 0  | 7100 | Vejle             | Male    | In care                | 55.734532 | 9.529962  | Urban area | Positive | Jutland south of the Limfjord | Absent  | 26.09.2016 |
| 429 | 0.23 | 0  | 7000 | Fredericia        | Female  | In care                | 55.530174 | 9.716283  | Urban area | Positive | Jutland south of the Limfjord | Absent  | 29.09.2016 |
| 431 | 0.7  | 0  | 6000 | Kolding           | Female  | In care                | 55.449907 | 9.421538  | Rural area | Positive | Jutland south of the Limfjord | Present | 03.10.2016 |
| 432 | 0.52 | 0  | 8722 | Hedensted         | Male    | Naturally, in the wild | 55.754026 | 9.719057  | Rural area | Positive | Jutland south of the Limfjord | Absent  | 19.09.2016 |
| 433 | 0.2  | 0  | 9900 | Frederikshavn     | Female  | In care                | 57.452804 | 10.517431 | Urban area |          | Jutland north of the Limfjord | Absent  | 10.09.2016 |
| 434 | 0.64 | 0  | 9800 | Hjørring          | Female  | In care                | 57.452425 | 10.012888 | Urban area |          | Jutland north of the Limfjord | Present | 01.08.2016 |
| 435 | 0.26 | 0  | 9900 | Hjørring          | Female  | In care                | 57.452804 | 10.517431 | Urban area |          | Jutland north of the Limfjord | Absent  | 10.09.2016 |
| 436 | 0.46 | 3  | 9900 | Frederikshavn     | Male    | Roadkill               | 57.451469 | 10.506754 | Urban area | Positive | Jutland north of the Limfjord | Present | 16.07.2016 |
| 438 | 0.62 | 0  | 7330 | Herning           | Male    | In care                | 55.952307 | 9.114642  | Urban area | Positive | Jutland south of the Limfjord | Present | 18.11.2016 |
| 439 | 0.57 | 3  | 8870 | Randers           | Female  | In care                | 55.952307 | 9.114642  | Urban area | Negative | Jutland south of the Limfjord | Present | 30.09.2016 |
| 440 | 0.51 | 2  | 7860 | Skive             | Male    | Naturally, in the wild | 55.952307 | 9.114642  | Urban area | Positive | Jutland south of the Limfjord | Present | 27.09.2016 |
| 442 | 0.57 | 1  | 6000 | Kolding           | Male    | Roadkill               | 55.378411 | 9.277429  | Rural area | Negative | Jutland south of the Limfjord | Present | 25.09.2016 |
| 445 | 0.63 | 0  | 5200 | Odense            | Female  | In care                | 55.397066 | 10.344436 | Urban area |          | Funen                         | Absent  | 26.09.2016 |
| 451 | 0.53 | 3  | 5800 | Nyborg            | Male    | Roadkill               | 55.325067 | 10.807361 | Urban area | Positive | Funen                         | Absent  | 11.06.2016 |
| 459 | 0.67 | 4  | 6600 | Vejen             | Female  | Naturally, in the wild | 55.469926 | 9.236335  | Rural area | Negative | Jutland south of the Limfjord | Present | 24.08.2016 |
| 487 | 0.55 | 1  | 8930 | Randers           | Female  | Roadkill               | 56.482239 | 10.042145 | Urban area | Negative | Jutland south of the Limfjord | Present | 30.08.2016 |
| 489 | 0.55 | 6  | 6100 | Haderslev         | Male    | Naturally, in the wild | 55.218627 | 9.55185   | Rural area | Positive | Jutland south of the Limfjord | Present | 28.08.2016 |
| 490 | 0.59 | 4  | 8920 | Randers           | Female  | Roadkill               | 56.734670 | 10.125432 | Rural area | Negative | Jutland south of the Limfjord | Present | 07.09.2016 |
| 502 | 0.53 | 4  | 5260 | Odense            | Female  | In care                | 55.319387 | 10.320908 | Rural area |          | Funen                         | Absent  | 24.08.2016 |
| 539 | 0.51 | 6  | 6230 | Aabenraa          | Female  | Naturally, in the wild | 55.026866 | 9.305407  | Urban area |          | Jutland south of the Limfjord | Present | 16.10.2011 |
| 562 | 0.54 | 5  | 9200 | Aalborg           | Female  | Roadkill               | 57.001690 | 9.866017  | Urban area |          | Jutland south of the Limfjord | Present | 30.07.2016 |
| 571 | 0.56 | 11 | 5884 | Svendborg         | Male    | Naturally, in the wild | 55.137311 | 10.730383 | Rural area |          | Funen                         | Present | 26.06.2016 |
| 589 | 0.51 | 4  | 8600 | Silkeborg         | Female  | In care                | 56.166612 | 9.553466  | Urban area |          | Jutland south of the Limfjord | Present | 01.09.2016 |
| 593 | 0.55 | 5  | 8380 | Aarhus            | Female  | Naturally, in the wild | 56.249876 | 10.150966 | Rural area |          | Jutland south of the Limfjord | Present | 29.09.2016 |
| 604 | 0.51 | 5  | 4200 | Slagelse          | Male    | Roadkill               | 55.329357 | 11.398885 | Rural area |          | Zealand                       | Absent  | 03.09.2016 |
| 631 | 0.54 | 4  | 5700 | Svendborg         | Female  | Roadkill               | 55.036033 | 10.630931 | Rural area |          | Funen                         |         | 06.05.2016 |
| 671 | 0.5  | 4  | 6900 | Ringkøbing-Skjern | Male    | Naturally, in the wild | 55.946342 | 8.481356  | Urban area |          | Jutland south of the Limfjord |         | 23.08.2016 |
| 684 | 0.52 | 5  | 8381 | Aarhus            | Male    | Naturally, in the wild | 56.188492 | 10.087136 | Urban area |          | Jutland south of the Limfjord |         | 17.08.2016 |
| 687 | 0.46 | 5  | 8420 | Syddjurs          | Female  | Naturally, in the wild | 56.120058 | 10.505771 | Urban area |          | Jutland south of the Limfjord |         | 13.06.2016 |
| 696 | 0.64 | 4  | 6400 | Sonderborg        | Female  | Naturally, in the wild | 54.915153 | 9.783566  | Urban area |          | Jutland south of the Limfjord |         | 10.10.2016 |

Table 3. Overview of the number of pesticides with positive detection.

| <b>Number of the 19 compounds detected in the individual</b> | <b>Number of individuals</b> |
|--------------------------------------------------------------|------------------------------|
| 0                                                            | 8                            |
| 1                                                            | 16                           |
| 2                                                            | 22                           |
| 3                                                            | 13                           |
| 4                                                            | 23                           |
| 5                                                            | 13                           |
| 6                                                            | 10                           |
| 7                                                            | 7                            |
| 8                                                            | 2                            |
| 9                                                            | 1                            |



Table 4. Results from the screening for the 19 selected substances in the 115 liver samples from hedgehogs, distributed across the 8 regions. Number of positive samples (N), percentage distribution of positive samples (%) i.e. samples above the method detection limit, median values of the positive samples (Median), minimum concentration above the method detection limit (Min), maximum concentration (Max). For Median, Min and Max the values are given in ng/g. The substance fipronil is omitted from the table as it was below detection limits in all samples. Note that for statistical tests, all values below method detection limits were replaced by zero, resulting in median values of 0 for the majority of compounds.

|                     | Region      | Zealand    | Jutland north of the Limfjord | Mon      | Lolland   | Jutland south of the Limfjord | Fyn       | Falster   | Bornholm |
|---------------------|-------------|------------|-------------------------------|----------|-----------|-------------------------------|-----------|-----------|----------|
|                     | Sample size | 37         | 5                             | 1        | 3         | 47                            | 8         | 9         | 5        |
| <b>Rodenticides</b> |             |            |                               |          |           |                               |           |           |          |
| Coumatetralyl       | N           | 16 (43.2%) | 1 (20%)                       | 1 (100%) | 2 (66.7%) | 17 (36.2%)                    | 3 (37.5%) | 4 (44%)   | 2 (40%)  |
|                     | Min.        | 0.068      | 0.319                         | 6.165    | 0.180     | 0.107                         | 0.151     | 0.210     | 0.130    |
|                     | Max         | 12.431     | 0.319                         | 6.165    | 2.869     | 23.68                         | 0.890     | 2.338     | 0.295    |
|                     | Median      | 0.384      | 0.319                         | 6.165    | 1.525     | 0.598                         | 0.739     | 0.387     | 0.213    |
| Bromadiolone        | N           | 28 (75.7%) | 2 (40%)                       | 1 (100%) | 3 (100%)  | 38 (88.4%)                    | 8 (100%)  | 6 (66.7%) | 5 (100%) |
|                     | Min.        | 0.107      | 0.296                         | 0.360    | 0.592     | 0.118                         | 0.107     | 0.345     | 0.179    |
|                     | Max         | 1189.877   | 1.037                         | 0.360    | 272.448   | 2832.767                      | 994.094   | 566.515   | 39.750   |
|                     | Median      | 0.952      | 0.667                         | 0.360    | 1.796     | 17.757                        | 95.414    | 1.057     | 14.881   |
| Difenacoum          | N           | 8 (21.6%)  |                               |          | 2 (66.7%) | 20 (46.5%)                    | 1 (12.5%) |           |          |
|                     | Min.        | 0.081      |                               |          | 0.192     | 0.099                         | 3.043     |           |          |
|                     | Max         | 1.412      |                               |          | 2.409     | 29.718                        | 3.043     |           |          |
|                     | Median      | 0.164      |                               |          | 1.301     | 0.311                         | 3.043     |           |          |
| Brodifacoum         | N           | 10 (27.0%) |                               |          | 2 (66.7%) | 16 (37.2%)                    | 5 (62.5%) | 4 (44%)   |          |
|                     | Min.        | 0.096      |                               |          | 0.103     | 0.097                         | 0.118     | 0.189     |          |
|                     | Max         | 2.559      |                               |          | 0.108     | 18.578                        | 2.319     | 0.772     |          |
|                     | Median      | 0.198      |                               |          | 0.106     | 0.768                         | 0.167     | 0.447     |          |
| Difethialone        | N           | 14 (37.8%) |                               |          | 1 (33.3%) | 7 (16.3%)                     | 5 (62.5%) | 3 (33.3%) | 1 (20%)  |
|                     | Min.        | 0.069      |                               |          | 0.175     | 0.079                         | 0.086     | 0.099     | 0.279    |

|                      |                   |            |         |          |           |            |         |           |         |
|----------------------|-------------------|------------|---------|----------|-----------|------------|---------|-----------|---------|
|                      | <b>Max</b>        | 2.047      |         | 0.175    | 0.517     | 59.223     | 0.498   | 0.279     |         |
|                      | <b>Median</b>     | 0.325      |         | 0.175    | 0.092     | 0.432      | 0.120   | 0.279     |         |
| $\alpha$ -chloralose | <b>N</b>          |            |         |          | 3 (7.0%)  |            |         | 1 (20%)   |         |
|                      | <b>Min.</b>       |            |         |          | 0.088     |            |         | 0.233     |         |
|                      | <b>Max</b>        |            |         |          | 0.097     |            |         | 0.233     |         |
|                      | <b>Median</b>     |            |         |          | 0.093     |            |         | 0.233     |         |
| $\beta$ -chloralose  | <b>N</b>          | 3 (8.1%)   |         |          |           |            |         |           |         |
|                      | <b>Min.</b>       | 0.063      |         |          |           |            |         |           |         |
|                      | <b>Max</b>        | 0.086      |         |          |           |            |         |           |         |
|                      | <b>Median</b>     | 0.076      |         |          |           |            |         |           |         |
| <b>Insecticides</b>  |                   |            |         |          |           |            |         |           |         |
| Imidacloprid         | <b>N</b>          | 17 (45.9%) | 2 (40%) | 1 (100%) | 3 (100%)  | 10 (23.2%) | 2 (25%) | 3 (33.3%) | 2 (40%) |
|                      | <b>Min.</b>       | 0.160      | 0.262   | 0.204    | 0.184     | 0.187      | 0.221   | 0.224     | 0.205   |
|                      | <b>Max</b>        | 0.808      | 0.566   | 0.204    | 0.282     | 0.518      | 0.486   | 0.389     | 0.429   |
|                      | <b>Median</b>     | 0.361      | 0.414   | 0.204    | 0.269     | 0.295      | 0.354   | 0.241     | 0.317   |
| Permethrin (cis)     | <b>N</b>          | 8 (21.6%)  | 1 (20%) | 1 (100%) | 1 (33.3%) | 6 (13.9%)  | 2 (25%) | 2 (22.2%) | 1 (20%) |
|                      | <b>Min.</b>       | 0.060      | 0.072   | 0.064    | 0.068     | 0.056      | 0.066   | 0.060     | 0.067   |
|                      | <b>Max</b>        | 23.831     | 0.072   | 0.064    | 0.068     | 13.227     | 0.066   | 0.077     | 0.067   |
|                      | <b>Variance</b>   | 70.585     | 0.000   | 0.000    | 0.000     | 28.877     | 0.000   | 0.000     | 0.000   |
|                      | <b>Stand. dev</b> | 8.401      | 0.000   | 0.000    | 0.000     | 5.374      | 0.000   | 0.012     | 0.000   |
|                      | <b>Median</b>     | 0.071      | 0.072   | 0.064    | 0.068     | 0.067      | 0.066   | 0.069     | 0.067   |
| Permethrin (trans)   | <b>N</b>          | 1 (2.7%)   |         |          |           |            |         |           |         |
|                      | <b>Min.</b>       | 0.316      |         |          |           |            |         |           |         |
|                      | <b>Max</b>        | 0.316      |         |          |           |            |         |           |         |
|                      | <b>Median</b>     | 0.316      |         |          |           |            |         |           |         |
| <b>Herbicides</b>    |                   |            |         |          |           |            |         |           |         |
| Diflufenican         | <b>N</b>          | 3 (8.1%)   |         | 1 (100%) |           | 7 (16.3%)  | 2 (25%) |           |         |

|              |               |           |           |            |           |           |         |
|--------------|---------------|-----------|-----------|------------|-----------|-----------|---------|
|              | <b>Min.</b>   | 0.078     | 0.459     | 0.114      | 0.126     |           |         |
|              | <b>Max</b>    | 0.174     | 0.459     | 1.278      | 0.459     |           |         |
|              | <b>Median</b> | 0.114     | 0.459     | 0.248      | 0.293     |           |         |
| Prosulfocarb | <b>N</b>      | 1 (2.7%)  | 1 (33.3%) | 2 (4.6%)   |           |           | 1 (20%) |
|              | <b>Min.</b>   | 0.114     | 0.229     | 0.100      |           |           | 0.153   |
|              | <b>Max</b>    | 0.114     | 0.229     | 0.180      |           |           | 0.153   |
|              | <b>Median</b> | 0.114     | 0.229     | 0.140      |           |           | 0.153   |
| MCPA         | <b>N</b>      | 3 (8.1%)  | 1 (20%)   | 6 (13.9%)  | 1 (12.5%) | 2 (22.2%) | 1 (20%) |
|              | <b>Min.</b>   | 0.113     | 1.030     | 0.176      | 2.375     | 0.180     | 0.328   |
|              | <b>Max</b>    | 0.469     | 1.030     | 103.638    | 2.375     | 1.724     | 0.328   |
|              | <b>Median</b> | 0.365     | 1.030     | 5.388      | 2.375     | 0.952     | 0.328   |
| 2,4-D        | <b>N</b>      | 2 (5.4%)  | 1 (33.3%) | 9 (20.9%)  | 1 (12.5%) |           | 1 (20%) |
|              | <b>Min.</b>   | 0.609     | 1.831     | 0.094      | 0.210     |           | 0.164   |
|              | <b>Max</b>    | 2.461     | 1.831     | 3.106      | 0.210     |           | 0.164   |
|              | <b>Median</b> | 1.535     | 1.831     | 0.170      | 0.210     |           | 0.164   |
| Fluroxypyr   | <b>N</b>      |           |           | 1 (2.3%)   |           |           |         |
|              | <b>Min.</b>   |           |           | 0.174      |           |           |         |
|              | <b>Max</b>    |           |           | 0.174      |           |           |         |
|              | <b>Sum</b>    |           |           | 0.174      |           |           |         |
|              | <b>Median</b> |           |           | 0.174      |           |           |         |
| Metamitron   | <b>N</b>      | 9 (24.3%) | 1 (100%)  | 15 (20.9%) | 3 (37.5%) | 3 (33.3%) | 2 (40%) |
|              | <b>Min.</b>   | 0.081     | 7.204     | 0.108      | 0.133     | 0.142     | 0.157   |
|              | <b>Max</b>    | 0.481     | 7.204     | 0.729      | 0.959     | 0.397     | 0.162   |
|              | <b>Median</b> | 0.183     | 7.204     | 0.305      | 0.890     | 0.345     | 0.160   |
| Bentazone    | <b>N</b>      | 2 (5.4%)  |           | 1 (2.3%)   |           |           |         |
|              | <b>Min.</b>   | 0.100     |           | 0.101      |           |           |         |
|              | <b>Max</b>    | 0.700     |           | 0.101      |           |           |         |

|               |               |       |          |           |
|---------------|---------------|-------|----------|-----------|
|               | <b>Median</b> | 0.400 |          | 0.101     |
| Pendimethalin | <b>N</b>      |       | 1 (2.3%) | 1 (12.5%) |
|               | <b>Min.</b>   |       | 0.140    | 0.151     |
|               | <b>Max</b>    |       | 0.140    | 0.151     |
|               | <b>Median</b> |       | 0.140    | 0.151     |

Table 5. Summary of all results above method detection limits from the chemical analysis of the 115 hedgehogs included in this study (the blank fields indicate results below method detection limits).

| ID  | Rodenticides   |               |             |              |              |                       |                      | Insecticides  |                   |                     | Herbicides    |               |       |       |             |             |           |                |
|-----|----------------|---------------|-------------|--------------|--------------|-----------------------|----------------------|---------------|-------------------|---------------------|---------------|---------------|-------|-------|-------------|-------------|-----------|----------------|
|     | Coumate-tralyl | Broma-diolone | Difena-coum | Brodi-facoum | Difet-hialon | $\alpha$ -chlo-ralose | $\beta$ -chlo-ralose | Imidaclo-prid | Perme-thrin (cis) | Perme-thrin (trans) | Diffufe-nican | Prosulfo-carb | MCPA  | 2,4-D | Fluroxy-pyr | Metami-tron | Benta-zon | Pendime-thalin |
| 4   | 0.548          | 1.051         |             | 0.621        |              |                       |                      | 0.224         |                   |                     |               |               |       |       |             |             |           |                |
| 14  |                | 458.446       | 0.215       | 10.647       | 0.102        | 0.088                 |                      |               |                   |                     |               |               | 2.194 | 0.174 |             |             |           |                |
| 16  | 4.141          | 0.954         | 3.723       |              |              |                       |                      | 0.518         |                   |                     |               |               |       |       |             | 0.231       |           | 0.14           |
| 24  | 0.107          | 0.482         |             | 0.097        |              |                       |                      | 0.243         | 13.227            |                     |               |               |       | 0.164 |             |             |           |                |
| 48  | 6.165          | 1.796         | 0.192       |              |              |                       |                      | 0.282         |                   |                     |               |               |       |       |             |             |           |                |
| 58  |                | 0.459         |             | 0.178        |              |                       |                      | 0.408         |                   |                     |               |               |       |       |             |             |           |                |
| 60  | 2.869          | 272.448       | 2.409       | 0.103        |              |                       |                      | 0.269         | 0.068             |                     |               |               |       | 1.831 |             |             |           |                |
| 61  | 1.217          | 3.112         |             | 0.153        | 0.25         |                       |                      | 0.265         | 0.072             |                     |               |               |       |       |             |             |           |                |
| 108 |                |               |             |              |              |                       |                      |               | 0.069             |                     |               |               |       |       |             |             |           |                |
| 111 |                |               |             |              |              |                       |                      | 0.565         | 0.073             |                     |               |               |       |       |             |             |           |                |
| 160 | 12.431         | 0.379         |             |              |              |                       |                      | 0.278         |                   |                     |               |               |       |       |             | 0.362       | 0.7       |                |
| 171 | 0.694          | 1189.877      | 1.412       | 2.559        | 0.108        |                       |                      |               |                   |                     |               |               |       |       |             |             |           |                |
| 182 |                |               |             |              |              |                       |                      |               | 0.06              |                     |               |               |       |       |             |             |           |                |
| 184 | 0.319          | 0.592         |             | 0.108        | 0.175        |                       |                      | 0.184         | 0.064             |                     |               | 0.229         |       |       |             |             |           |                |
| 193 |                | 0.114         |             |              | 0.173        |                       |                      |               | 0.06              |                     |               |               |       |       |             |             |           |                |
| 195 |                | 0.657         |             |              | 0.478        |                       | 0.086                | 0.215         |                   |                     | 0.114         | 0.114         | 0.113 | 2.461 |             |             |           |                |
| 196 |                |               |             |              |              |                       |                      | 0.457         |                   |                     |               |               |       |       |             | 0.158       |           |                |
| 197 | 0.174          | 34.721        | 0.144       |              | 0.069        |                       |                      | 0.336         |                   |                     |               |               |       |       |             | 0.284       |           |                |
| 199 | 9.456          | 0.107         |             |              |              |                       |                      | 0.361         | 0.061             |                     |               |               |       |       |             |             |           |                |
| 202 | 0.303          | 0.13          |             | 0.096        | 0.714        |                       |                      | 0.402         |                   |                     |               |               |       |       |             | 0.183       |           |                |
| 206 |                |               |             |              |              |                       |                      |               | 23.831            |                     |               |               |       |       |             |             | 0.1       |                |
| 207 | 0.154          |               |             |              |              |                       |                      |               |                   |                     |               |               |       |       |             |             |           |                |
| 208 |                | 0.499         |             |              |              |                       | 0.076                | 0.808         | 0.072             |                     |               |               |       |       |             |             |           |                |
| 209 |                | 0.163         |             |              |              |                       |                      | 0.16          |                   |                     |               |               |       |       |             |             |           |                |
| 210 |                | 0.36          |             |              |              |                       |                      | 0.204         |                   |                     | 0.459         |               |       |       |             | 7.204       |           |                |
| 211 | 0.755          | 3.642         |             | 1.123        |              |                       |                      |               |                   |                     |               |               |       |       |             |             |           |                |
| 212 | 3.902          | 4.527         |             |              | 2.047        |                       |                      |               |                   |                     |               |               |       |       |             |             |           |                |
| 214 |                | 1.165         |             | 0.23         | 0.293        |                       | 0.063                | 0.403         |                   |                     | 0.078         |               |       |       |             | 0.481       |           |                |
| 215 |                | 76.508        | 0.183       |              | 0.477        |                       |                      |               |                   |                     |               |               |       |       |             |             |           |                |
| 220 | 0.295          | 39.75         |             |              | 0.279        | 0.233                 |                      | 0.429         | 0.067             |                     |               | 0.153         |       |       |             |             |           |                |
| 222 |                |               |             |              |              |                       |                      | 0.654         | 0.069             |                     |               |               |       |       |             |             |           |                |
| 223 |                | 0.118         |             |              | 0.118        |                       |                      | 0.225         | 0.059             |                     |               |               | 3.106 |       |             |             |           |                |
| 225 |                | 2.144         |             |              |              |                       |                      | 0.247         | 0.067             |                     |               |               |       |       |             |             | 0.101     |                |
| 226 |                | 2832          |             | 0.37         | 0.079        |                       |                      |               | 0.073             |                     |               |               |       |       |             |             |           |                |
| 227 |                | 0.296         |             |              |              |                       |                      | 0.262         | 0.072             |                     |               |               |       |       |             |             |           |                |
| 228 |                | 0.693         |             |              |              |                       |                      | 0.267         | 0.066             |                     |               | 0.18          |       | 0.408 |             |             |           |                |

Supplementary Material

|     |        |         |       |        |       |       |  |       |  |       |       |       |       |      |  |       |       |
|-----|--------|---------|-------|--------|-------|-------|--|-------|--|-------|-------|-------|-------|------|--|-------|-------|
| 229 | 0.196  | 103.81  | 0.115 |        |       |       |  |       |  |       |       |       |       |      |  |       |       |
| 230 | 20.643 | 0.208   | 3.676 |        | 0.092 |       |  | 0.187 |  |       |       |       |       |      |  |       |       |
| 234 | 2.144  | 492.959 | 0.099 | 10.269 |       |       |  | 0.323 |  |       | 0.569 |       |       |      |  | 0.305 |       |
| 235 |        | 713.631 | 1.389 | 3.547  |       |       |  |       |  |       | 0.121 |       |       |      |  |       |       |
| 236 |        | 0.295   |       |        |       |       |  |       |  |       | 1.278 |       |       | 0.17 |  | 0.387 |       |
| 237 | 0.598  | 0.259   | 0.13  |        |       |       |  |       |  |       |       |       |       |      |  |       |       |
| 239 |        | 23.881  |       |        |       | 0.432 |  |       |  |       |       |       |       | 0.21 |  | 0.89  |       |
| 240 |        | 2.806   |       | 0.141  | 0.094 |       |  |       |  | 0.066 |       |       |       |      |  |       |       |
| 242 | 1.069  | 78.802  | 0.15  | 0.944  | 0.085 | 0.097 |  | 0.334 |  |       |       |       |       |      |  |       | 0.355 |
| 247 |        |         |       | 0.097  | 0.517 |       |  | 0.405 |  |       | 0.1   | 8.487 |       |      |  |       | 0.438 |
| 257 | 0.58   | 67.912  | 0.18  |        |       |       |  |       |  |       |       |       |       |      |  |       | 0.127 |
| 258 |        | 43.494  |       | 0.882  |       |       |  |       |  |       |       |       |       |      |  |       |       |
| 262 |        |         |       |        |       |       |  |       |  |       |       |       |       |      |  |       | 0.192 |
| 264 |        |         | 0.9   |        |       |       |  |       |  |       |       |       | 0.094 |      |  |       | 0.112 |
| 267 | 0.206  | 7.777   | 0.133 | 1.271  |       |       |  |       |  |       |       |       |       |      |  |       |       |
| 268 | 2.525  | 0.533   | 0.778 | 0.217  |       |       |  | 0.348 |  |       |       |       | 0.609 |      |  |       | 0.117 |
| 273 |        |         |       |        |       |       |  |       |  |       |       |       |       |      |  |       |       |
| 278 |        | 1.812   | 0.211 |        |       |       |  |       |  |       |       |       |       |      |  |       |       |
| 281 |        | 169.752 |       | 0.139  |       |       |  |       |  |       |       |       |       |      |  |       |       |
| 305 | 2.227  | 1066    | 0.363 | 6.349  |       |       |  |       |  |       |       |       |       |      |  |       |       |
| 311 |        | 0.738   |       |        |       |       |  | 0.683 |  |       |       |       |       |      |  |       |       |
| 312 | 0.465  |         |       | 0.103  | 0.077 |       |  | 0.291 |  | 0.316 |       |       |       |      |  |       | 0.235 |
| 326 |        | 0.587   |       |        |       |       |  |       |  |       |       |       | 0.167 |      |  |       | 0.195 |
| 327 |        | 0.121   |       |        |       |       |  | 0.238 |  |       |       |       |       |      |  |       |       |
| 328 | 0.14   | 38.363  |       | 0.139  | 0.963 |       |  |       |  |       |       |       | 0.469 |      |  |       |       |
| 329 | 0.098  | 174.661 | 0.121 |        |       |       |  |       |  |       |       |       |       |      |  |       |       |
| 330 |        | 20.786  |       |        |       | 1.198 |  |       |  |       |       |       |       |      |  |       |       |
| 331 | 0.89   | 566.515 |       | 0.189  | 0.12  |       |  |       |  |       |       |       |       |      |  |       |       |
| 332 |        |         |       |        |       |       |  | 0.389 |  |       |       |       | 1.724 |      |  |       |       |
| 333 |        |         |       |        |       |       |  |       |  |       |       |       |       |      |  |       |       |
| 334 |        | 0.345   |       |        |       |       |  |       |  |       |       |       |       |      |  |       | 0.345 |
| 336 |        | 1.062   |       | 0.272  | 0.498 |       |  | 0.241 |  |       |       | 0.18  |       |      |  |       | 0.397 |
| 337 | 0.225  | 0.943   |       |        |       |       |  |       |  |       |       |       |       |      |  |       |       |
| 343 |        | 0.226   |       |        |       |       |  |       |  |       |       |       |       |      |  |       |       |
| 345 | 0.068  | 104.559 | 0.081 |        | 0.194 |       |  |       |  |       |       |       |       |      |  |       | 0.123 |
| 361 | 0.21   | 345.294 |       | 0.772  | 0.099 |       |  |       |  |       |       |       |       |      |  |       | 0.142 |
| 362 |        | 0.48    |       |        |       |       |  |       |  |       |       |       |       |      |  |       |       |
| 365 | 2.338  | 15.295  |       |        |       |       |  |       |  |       |       |       | 0.164 |      |  |       | 0.157 |
| 366 |        | 3.613   |       |        |       |       |  | 0.077 |  |       |       |       |       |      |  |       |       |

|     |       |         |        |        |        |       |  |       |  |       |  |  |         |       |  |  |       |  |       |
|-----|-------|---------|--------|--------|--------|-------|--|-------|--|-------|--|--|---------|-------|--|--|-------|--|-------|
| 371 | 0.13  | 0.179   |        |        |        |       |  | 0.205 |  |       |  |  |         |       |  |  | 0.162 |  |       |
| 373 |       | 14.881  |        |        |        |       |  |       |  |       |  |  | 0.328   |       |  |  |       |  |       |
| 377 | 0.18  | 1.219   |        |        |        |       |  |       |  |       |  |  | 1.322   |       |  |  | 0.394 |  |       |
| 380 | 0.162 | 247.533 | 0.215  |        | 0.357  |       |  |       |  | 0.174 |  |  |         |       |  |  |       |  |       |
| 385 |       | 7.072   |        |        |        |       |  |       |  |       |  |  |         |       |  |  | 0.081 |  |       |
| 397 |       | 96.187  |        |        |        |       |  |       |  |       |  |  | 2.288   |       |  |  |       |  |       |
| 403 | 0.739 | 994.094 | 3.043  | 2.319  | 1.809  |       |  | 0.486 |  | 0.459 |  |  |         |       |  |  | 0.959 |  | 0.151 |
| 407 |       |         |        |        |        |       |  |       |  |       |  |  | 0.365   |       |  |  |       |  |       |
| 408 |       |         |        |        |        |       |  |       |  |       |  |  |         |       |  |  |       |  |       |
| 414 |       |         |        |        |        |       |  |       |  |       |  |  | 103.638 |       |  |  |       |  |       |
| 428 | 0.683 |         |        |        |        |       |  |       |  |       |  |  |         |       |  |  | 0.108 |  |       |
| 429 |       |         |        |        |        |       |  |       |  |       |  |  |         |       |  |  |       |  |       |
| 431 |       |         |        |        |        |       |  |       |  |       |  |  |         |       |  |  |       |  |       |
| 432 |       |         |        |        |        |       |  |       |  |       |  |  |         |       |  |  |       |  |       |
| 433 |       |         |        |        |        |       |  |       |  |       |  |  |         |       |  |  |       |  |       |
| 434 |       |         |        |        |        |       |  |       |  |       |  |  |         |       |  |  |       |  |       |
| 435 |       |         |        |        |        |       |  | 0.566 |  |       |  |  |         |       |  |  |       |  |       |
| 436 |       | 1.037   |        |        |        |       |  |       |  |       |  |  | 1.030   |       |  |  |       |  |       |
| 438 |       | 1.905   |        |        |        |       |  |       |  |       |  |  |         |       |  |  |       |  |       |
| 439 |       | 0.254   |        |        |        |       |  |       |  |       |  |  |         |       |  |  |       |  |       |
| 440 |       | 2.24    |        |        |        |       |  |       |  |       |  |  |         |       |  |  |       |  |       |
| 442 |       | 0.261   |        |        |        |       |  |       |  |       |  |  |         |       |  |  |       |  |       |
| 445 |       | 0.107   |        |        |        |       |  |       |  |       |  |  |         |       |  |  |       |  |       |
| 451 | 0.151 | 166.946 |        | 0.118  |        |       |  | 0.221 |  |       |  |  |         |       |  |  |       |  |       |
| 459 |       | 0.343   | 0.258  |        |        |       |  |       |  | 0.248 |  |  |         |       |  |  | 0.17  |  |       |
| 487 |       | 171.991 | 0.369  | 0.416  |        |       |  |       |  | 0.354 |  |  |         |       |  |  |       |  |       |
| 489 |       | 12.925  | 1.979  | 0.363  |        |       |  | 0.328 |  |       |  |  |         |       |  |  | 0.511 |  |       |
| 490 |       | 74.835  |        |        |        |       |  |       |  |       |  |  |         |       |  |  |       |  |       |
| 502 |       | 253.573 |        | 0.167  |        |       |  |       |  |       |  |  |         |       |  |  |       |  |       |
| 539 | 0.116 | 22.588  | 0.156  | 0.238  |        |       |  |       |  | 0.114 |  |  |         |       |  |  | 0.404 |  |       |
| 562 | 23.68 | 189.381 |        | 1.83   |        |       |  |       |  |       |  |  | 13.909  | 0.217 |  |  |       |  |       |
| 571 |       | 2.579   |        |        | 0.086  |       |  |       |  | 0.126 |  |  | 2.375   |       |  |  | 0.133 |  |       |
| 589 | 0.165 | 983.435 | 2.644  | 0.653  |        |       |  |       |  |       |  |  |         |       |  |  |       |  |       |
| 593 | 0.182 | 162.507 | 29.718 | 18.578 | 0.081  | 0.093 |  |       |  |       |  |  |         |       |  |  |       |  |       |
| 604 |       | 0.252   |        |        |        |       |  |       |  |       |  |  |         |       |  |  |       |  |       |
| 631 |       | 305.497 |        | 0.268  | 58.805 |       |  | 0.066 |  |       |  |  |         |       |  |  |       |  |       |
| 671 |       | 0.162   |        |        |        |       |  |       |  |       |  |  | 0.176   |       |  |  |       |  |       |
| 684 |       | 1.29    | 1.775  |        |        |       |  |       |  | 0.202 |  |  |         |       |  |  |       |  |       |
| 687 | 0.146 | 36.285  | 0.254  |        |        |       |  |       |  |       |  |  | 0.135   |       |  |  | 0.729 |  |       |
| 696 | 4.987 | 874.855 |        |        |        |       |  | 0.056 |  |       |  |  |         |       |  |  |       |  |       |

## References

1. Bekæmpelsesmiddeldatabasen [Internet]. Miljøstyrelsen (2023) [cited April 2023]. Available from: <https://mst.dk/kemi/database-for-bekaempelsesmidler/bmd/>.
2. Miljøstyrelsen. Bekæmpelsesmiddelstatistik 2016: Behandlingshyppighed Og Pesticidbelastning Baseret På Salg Og Forbrug. Miljøstyrelsen, Danmark: (2017).
3. Beasley VR. Direct and Indirect Effects of Environmental Contaminants on Amphibians. (2020).
4. Miljøstyrelsen. Bekæmpelsesmiddeldatabasen: The Danish Nature Agency, Miljøstyrelsen (2022) [cited 2022 October]. Available from: <https://mst.dk/kemi/database-for-bekaempelsesmidler/bmd/>.
5. Jackson D, Cornell CB, Luukinen B, Buhl K, Stone D. Fipronil Technical Fact Sheet: National Pesticide Information Center, Oregon State University Extension Services (2009) [cited 2022 October]. Available from: <http://npic.orst.edu/factsheets/archive/fiptech.html>.
6. Hainzl D, Cole LM, Casida JE. Mechanisms for Selective Toxicity of Fipronil Insecticide and Its Sulfone Metabolite and Desulfinyl Photoproduct. *Chemical research in toxicology* (1998) 11(12):1529-35.
7. Stocker L. *Notes from St Tiggywinkles: The Scandal of Toxic Flea Spray*. Haddenham, UK: St Tiggywinkles Wildlife Hospital (2014).
8. Bunnell T. [Internet]. UK: Toni Bunnell (2009). [cited 2022]. Available from: [https://www.tonibunnell.co.uk/hedgehog\\_rehab.html](https://www.tonibunnell.co.uk/hedgehog_rehab.html).
9. U.S. Environmental Protection Agency. New Pesticide Fact Sheet - Fipronil. Washington, DC: U.S. Environmental Protection Agency, Office of Prevention, Pesticides and Toxic Substances, Office of Pesticide Programs, U.S. Government Printing Office (1996) Contract No.: EPA 737-F-96-005.
10. Andrews N, Odenkirchen E, Hetrick J. Fipronil, Environmental Fate and Ecological Effects Assessment and Characterization for Section 18 Registration of in-Furrow Applications to Rutabaga and Turnips. Washington DC: Environmental Fate and Effects Division, United States Environmental Protection Agency, (2007).
11. Gibbons D, Morrissey C, Mineau P. A Review of the Direct and Indirect Effects of Neonicotinoids and Fipronil on Vertebrate Wildlife. *Environmental Science and Pollution Research* (2015) 22(1):103-18. doi: 10.1007/s11356-014-3180-5.
12. Singh NS, Sharma R, Singh SK, Singh DK. A Comprehensive Review of Environmental Fate and Degradation of Fipronil and Its Toxic Metabolites. *Environmental Research* (2021) 199:111316. doi: <https://doi.org/10.1016/j.envres.2021.111316>.
13. Cravedi JP, Delous G, Zalko D, Viguié C, Debrauwer L. Disposition of Fipronil in Rats. *Chemosphere* (2013) 93(10):2276-83. doi: <https://doi.org/10.1016/j.chemosphere.2013.07.083>.
14. Ensley S. Chapter 44 - Imidacloprid. In: Gupta RC, editor. *Veterinary Toxicology*. Oxford: Academic Press (2007). p. 505-7.
15. Yamamoto I, Yabuta G, Tomizawa M, Saito T, Miyamoto T, Kagabu S. Molecular Mechanism for Selective Toxicity of Nicotinoids and Neonicotinoids. *Journal of Pesticide Science* (1995) 20(1):33-40.
16. Rundlöf M, Andersson GK, Bommarco R, Fries I, Hederström V, Herbertsson L, et al. Seed Coating with a Neonicotinoid Insecticide Negatively Affects Wild Bees. *Nature* (2015) 521(7550):77-80.



17. Authority EFS. Peer Review of the Pesticide Risk Assessment for Bees for the Active Substance Imidacloprid Considering the Uses as Seed Treatments and Granules. *EFSA Journal* (2018) 16(2):e05178.
18. EU. Kommissionens Gennemførelsesforordning (Eu) 2021/621 Af 15. April 2021 Strasbourg: EU, (2021).
19. EU. Commission Implementing Regulation (Eu) 2018/783. Strasbourg: (2018).
20. Miljøstyrelsen. Undersøgelse Af Forbruget Af Pesticider På Offentlige Arealer I 2016. Miljøstyrelsen, Danmark: (2018).
21. Imamura L, Hasegawa H, Kurashina K, Hamanishi A, Tabuchi A, Tsuda M. Repression of Activity-Dependent C-Fos and Brain-Derived Neurotrophic Factor Mrna Expression by Pyrethroid Insecticides Accompanying a Decrease in Ca<sup>2+</sup> Influx into Neurons. *Journal of Pharmacology and Experimental Therapeutics* (2000) 295(3):1175-82.
22. Miljøstyrelsen. Salg Af Pesticider Til Brug I Private Haver 2017. Miljøstyrelsen, Danmark: (2019).
23. Dymond NL, Swift IM. Permethrin Toxicity in Cats: A Retrospective Study of 20 Cases. *Australian Veterinary Journal* (2008) 86(6):219-23. doi: <https://doi.org/10.1111/j.1751-0813.2008.00298.x>.
